# Supplementary material for: Age Associated Decrease of MT-1 Melatonin Receptor in Human Dermal Skin Fibroblasts Impairs Protection Against UV-Induced DNA Damage
Source: MDPI journal article supplement (doi:10.3390/ijms21010326), 2020-01-03
Supplement: s1 [file s1]

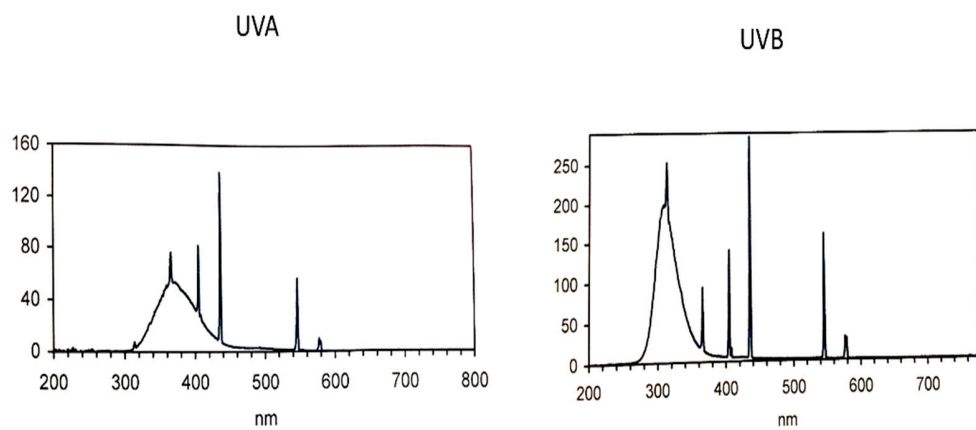

**Supplementary Figure 1:** UVR spectra from the Dr. Gröbel irradiation chamber fitted with UVA (F15T8BLB) and UVB (G15T8E) bulbs.
